# Supplementary material for: Tls1 regulates splicing of shelterin components to control telomeric heterochromatin assembly and telomere length
Source: PubMed Central journal article supplement (PMC4191416; doi:10.1093/nar/gku842), 2014-09-22
Supplement: supp_gku842_nar-01301-a-2014-File009.pdf [file supp_gku842_nar-01301-a-2014-File009.pdf]

```

Hs : -----MPVVRKIFRRR---RGDSESE--EDEQDSEEVRIKLEETREVQNLRRFPNGVSAVALLVGEKVQ-EETTLVDDFQMKTTGGMVDMKCLKERGGKDKIS
Mm : -----MRITGKTFRRR---RADSESE--EDEQSEEVRIKLEETREVQNLRRFPNGVSAVALLVGEKVQ-EETTLVDDFQMATGGMVDMKCLKERGGKDKVS
Xl : -----MFAG-RNFRRR---KASSSDEEVEDEGVTREVRMKLEEFKEVQSLRRFPNGVSAVALLVGEKLP-EEVNMADDFQKMQNGGMVDMKCLKDRGKDRIG
Lm : MS LAEETKAEATTKVLFKKA---GRKNLRQRKNSDEEEKKEEQTLDEIKERQRLRFPNGVSLVGLALGKKIAPETELAIKDFNVKTGGLVNMKQLKSGKMKEAD
At : -----MPPKRNFRKRSFEEE---EEDNDVNKAAISEEEEKRRIALEEVKFLQKLRPEKLGIEFLSSTAQSSIG-----KVKPVEKTETEG
Sp : ---MNSIHIKKKSNRSFRRRKVFGNEKEFDLEELDDNDIRLRQALPALK-RRKIRNSIIGINAEKILLNQETKKEKQINTANE-----HEANDQTSAQSSKLI

```

```

Hs : EEDDHLGTSFSAETNRDEDADMMKYIETELKRRK-----IVEHEEQVKPKNAED-CLMELPENIRVSSAKKTEEMLSNQMISGIEVVDLGIITAKIKNIISTE
Mm : EEDDHLGTSFSAETNRDEDADMMKYIETELKRRK-----IVEQEEQKAKPKNAED-CLMELPENIRVSSAKKTEEMLSNQMISGIEVVDLGIITAKIKNIISTE
Xl : EEDDHLGTSFSAETNRDEDADMMKYIETELKRRK-----IVENEEKVKPKSAED-CLMELPENIRVSSAKKTEEMLSNQMISGIEVVDLGIITAKIKNIISTE
Lm : LAYDVGIGTQFSAETNRDEDEEMKYIETELKRRKGGTDLAAEDDGDVNKYLTPCALALALPDHLQSSSHRSEEMLSNQMISGIEVVDLGIITAKIRNIEATE
At : EKEDVVLQDTFAQETAFLIEDPNMVKYIETELAKRRK---RNIDLAAEVENELKRVEDELKIEDHLAVK--KRSSEESSTQWTTGIAEVQLFIEYKLNIEETE
Sp : EAQLPTVEDRFAKQTNVLIINHLNLFVEKKIKQERLIA---QNYSENGETNALNTKNESTVQNIKNSLHPN---EHSFIRLAAALGATREVDLGIIS--TDVDNLK

```

## HEP59

```

Hs : DAKARLLAEQQNKKKDSSETS FVPTNMAVNYVCHNRFYHEELNAPIRRNKLEPKARPLRVGDTEKPEPERSPPNRKRFANEK--ATDDYHYEKFKKMNRRY----
Mm : DAKARLLAEQQNKKKDSSETS FVPTNMAVNYVCHNRFYHEELNAPIRRNKLEPKARPLRVGDTEKPEPERSPPNRKRFANEK--ATDDYHYEKFKKMNRRY----
Xl : EAKARLLAEQQNKKKDKHTSFVPTNMAVNYVCHNRFYQEDQNTPMRRHKLEPKPRPLRVGDTEKPEPEKSPPNRKRPSNEK--ATDDYHYEKFKKMNRRY----
Lm : EAKQLLQLAKNKK-DGPSQFVPTNMAVNYVCHNRFNIEDNSDQRRRREE-----REGN--KSAHQITNPN----GVKR--ATDDYHYDKFRKQFRRY----
At : AAKK-LLQERRLMGRPKSEFSIPSSYSADYFQRGDAEKLRRHEPELYKD-RGGPQADGEAAKPSSTSSSTNNADSGKSRQAATDQIMLERFRFRERNRVMRR
Sp : NGRKRQKKRARMKEKLDKALRTSEDLAR-----DETEKMLKPISQDEFS-----KGIYR-----RFRVYKDGTDQD-----

```

**Figure S1:** Sequence alignment of Tls1 homologues.

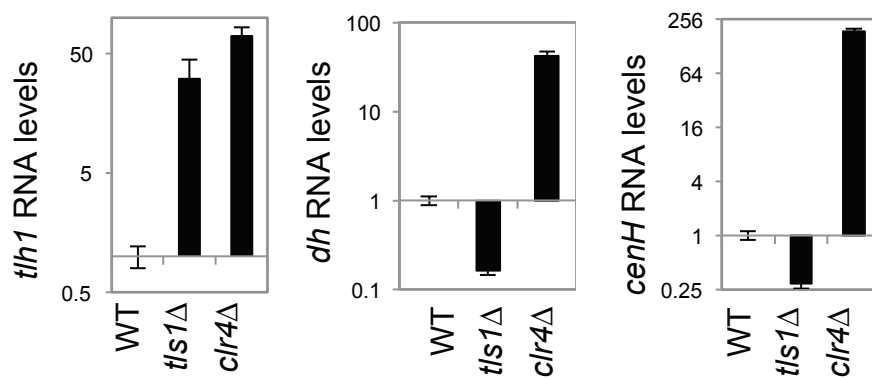

**Figure S2:** qRT-PCR analyses of transcripts derived from repeat elements, normalized to *act1*. The data is the same as Fig. 2C, but plotted in log scale to show the down regulation of *dh* and *cenH* RNAs.

**A**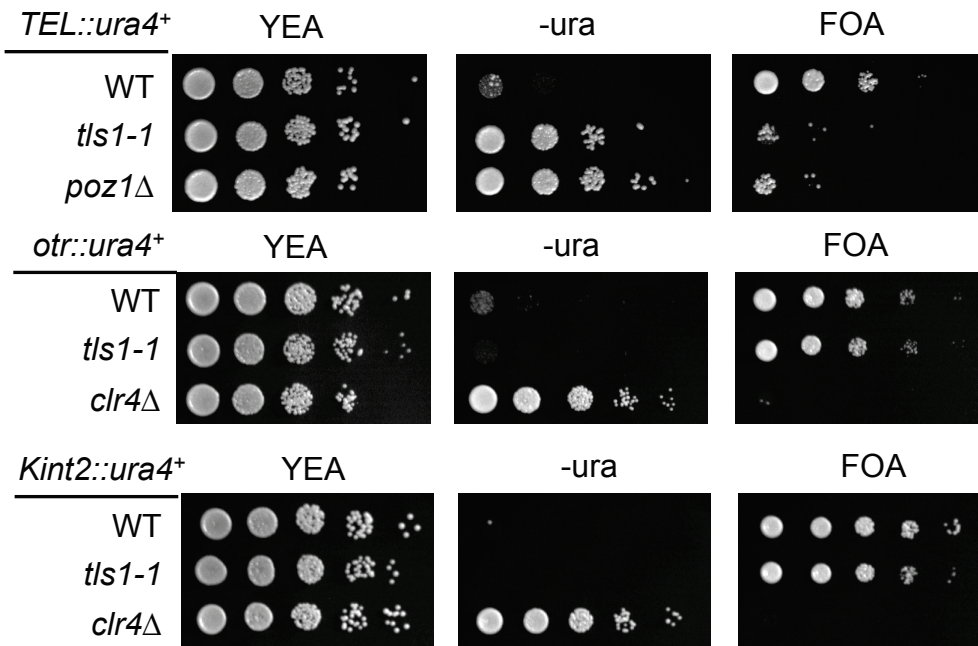**B**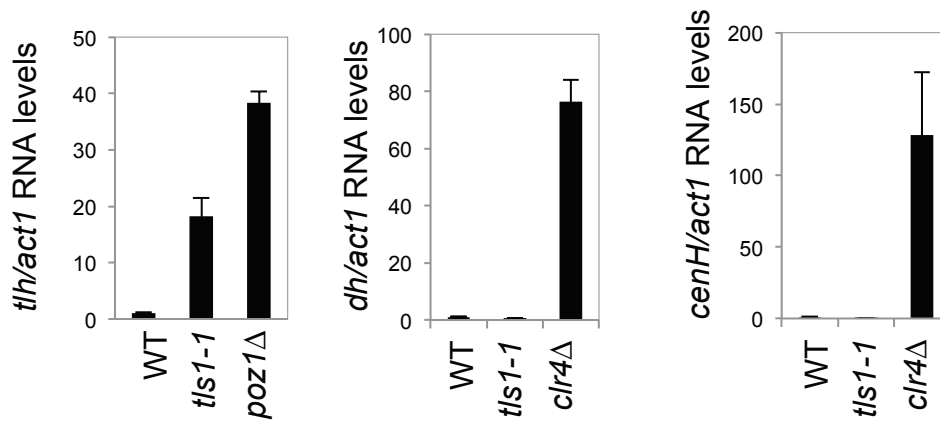**C**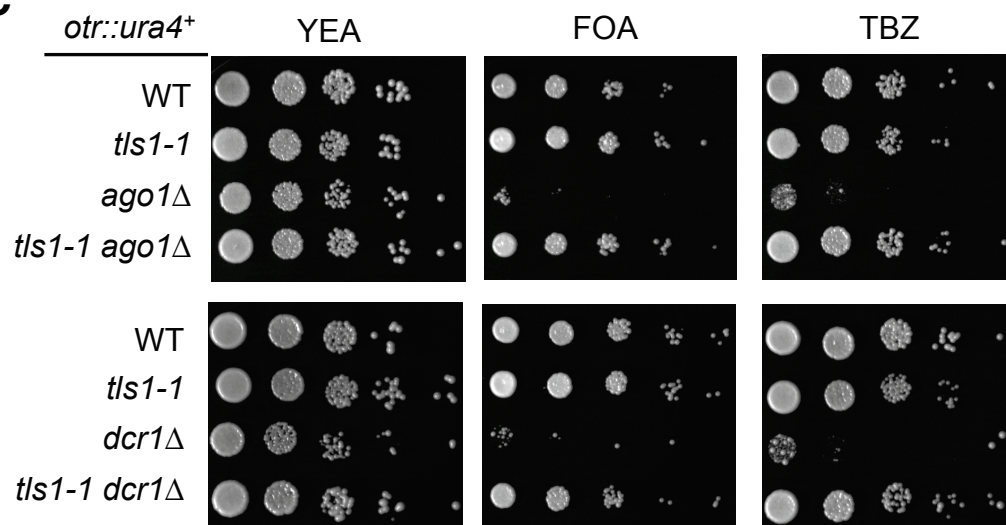

**Figure S3:** Characterization of *tls1-1*. (A and C) Serial dilution analyses to measure the expression of *ura4<sup>+</sup>* reporter genes and sensitivity to TBZ. (B) qRT-PCR analyses of transcripts derived from repeat elements, normalized to *act1*.
